# Supplementary material
Source: publisher figshare collection journal article supplement (https://acs.figshare.com/ndownloader/files/3741937)
Supplement: Supplementary file 1 [file 3741937]

Supporting Information

for

Aliphatic C–C Bond Cleavage of  $\alpha$ -Hydroxy  
Ketones by Nonheme Iron(II) Complexes:  
Mechanistic Insight into the Reaction Catalyzed by  
2,4'-Dihydroxyacetophenone Dioxygenase

*Rubina Rahaman, Sayantan Paria, and Tapan Kanti Paine\**

Department of Inorganic Chemistry, Indian Association for the Cultivation of Science,

2A & 2B Raja S. C. Mullick Road, Jadavpur, Kolkata 700032, India

Email: [ictkp@iacs.res.in](mailto:ictkp@iacs.res.in)

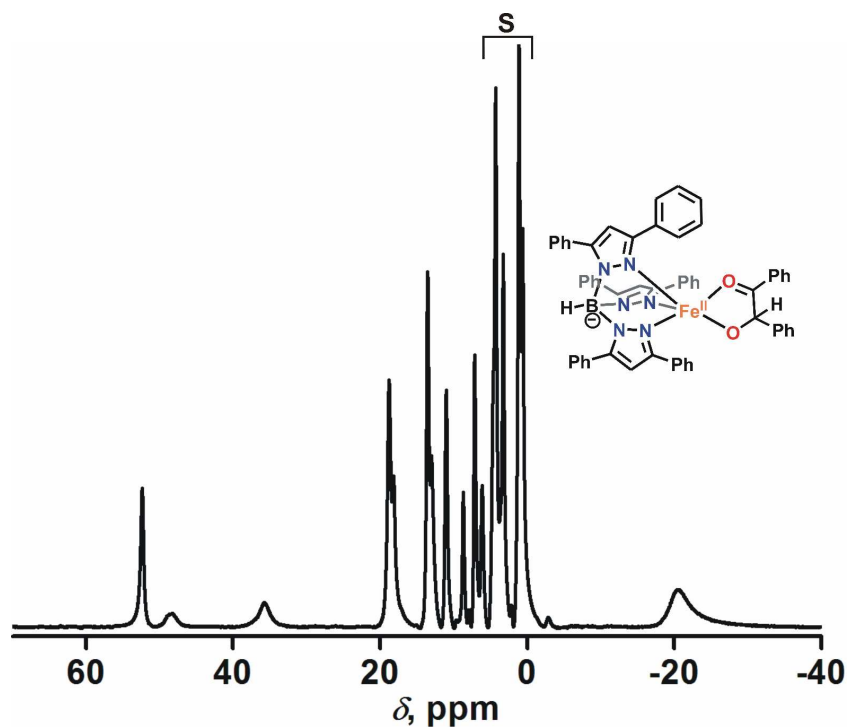

**Figure S1**  $^1\text{H}$  NMR (500 MHz,  $\text{C}_6\text{D}_6$ , 295 K) spectrum of  $[(\text{Tp}^{\text{Ph}_2})\text{Fe}^{\text{II}}(\text{PHAP})]$  (1). Peaks marked with 'S' are from residual solvents.

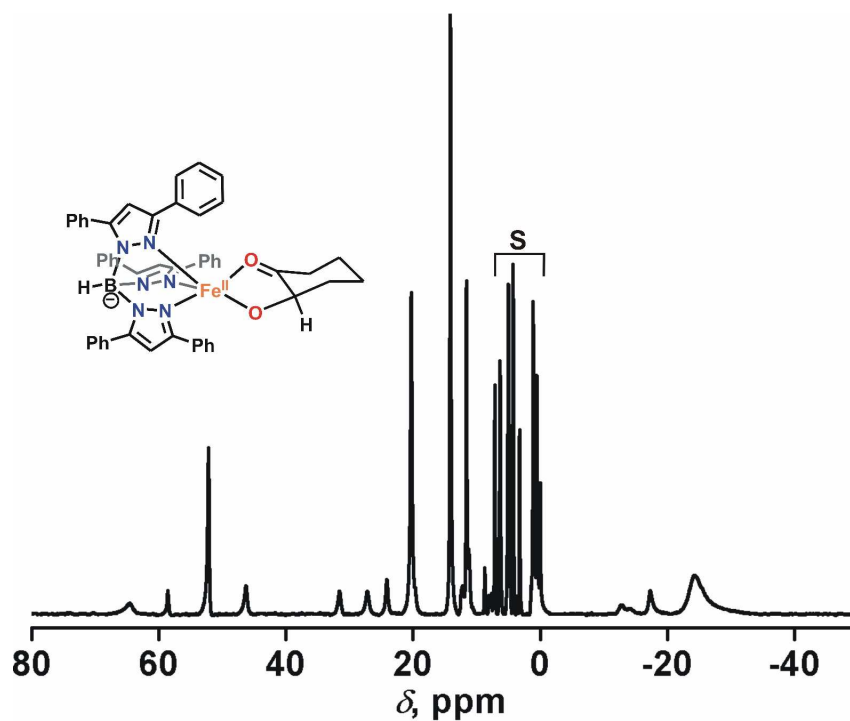

**Figure S2**  $^1\text{H}$  NMR (500 MHz,  $\text{C}_6\text{D}_6$ , 295 K) spectrum of  $[(\text{Tp}^{\text{Ph}_2})\text{Fe}^{\text{II}}(\text{HCH})]$  (2). Peaks marked with 'S' are from residual solvents.

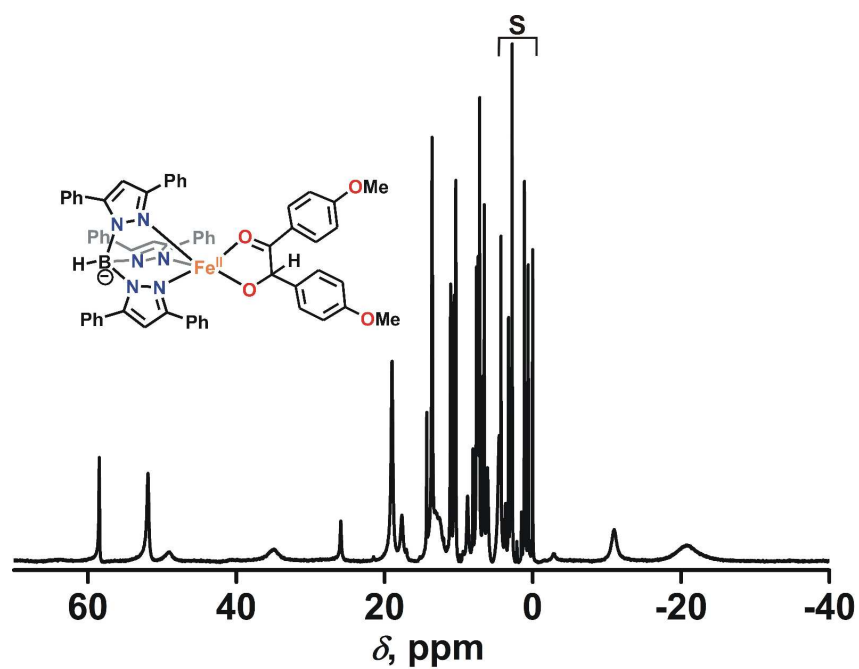

**Figure S3**  $^1\text{H}$  NMR (500 MHz,  $\text{C}_6\text{D}_6$ , 295 K) spectrum of  $[(\text{Tp}^{\text{Ph}_2})\text{Fe}^{\text{II}}(\text{HBME})]$  (3). Peaks marked with 'S' are from residual solvents.

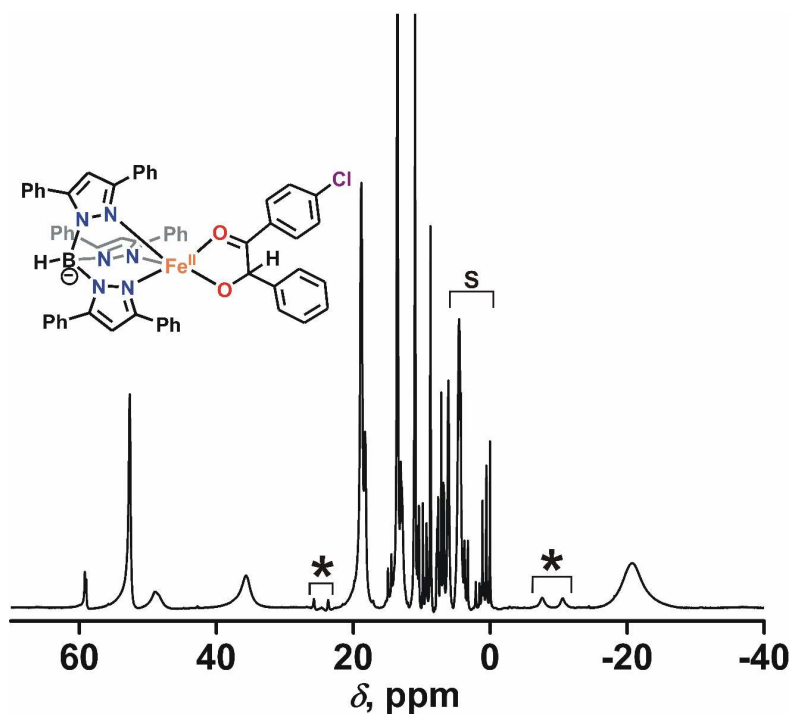

**Figure S4**  $^1\text{H}$  NMR (500 MHz,  $\text{C}_6\text{D}_6$ , 295 K) spectrum of  $[(\text{Tp}^{\text{Ph}_2})\text{Fe}^{\text{II}}(\text{CHPE})]$  (4). Peaks marked with 'S' are from residual solvents. \*-Marked peaks arise from species formed upon partial oxidation of the complex.

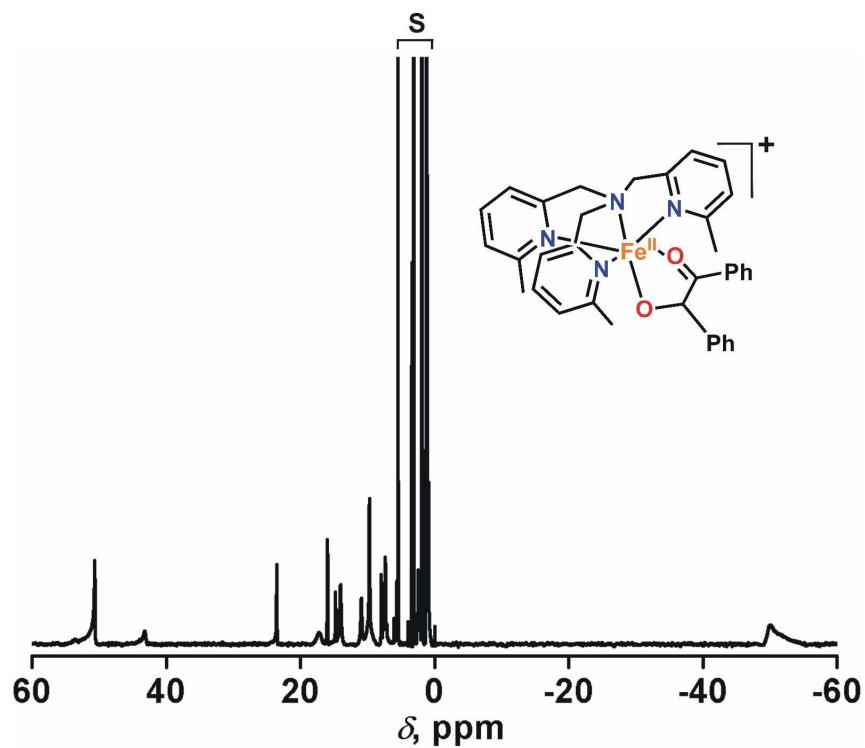

**Figure S5**  $^1\text{H}$  NMR (300 MHz,  $\text{CD}_3\text{CN}$ , 295 K) spectrum of  $[(6\text{-Me}_3\text{-TPA})\text{Fe}^{\text{II}}(\text{PHAP})](\text{ClO}_4)$  (**5**). Peaks marked with ‘S’ are from residual solvents.

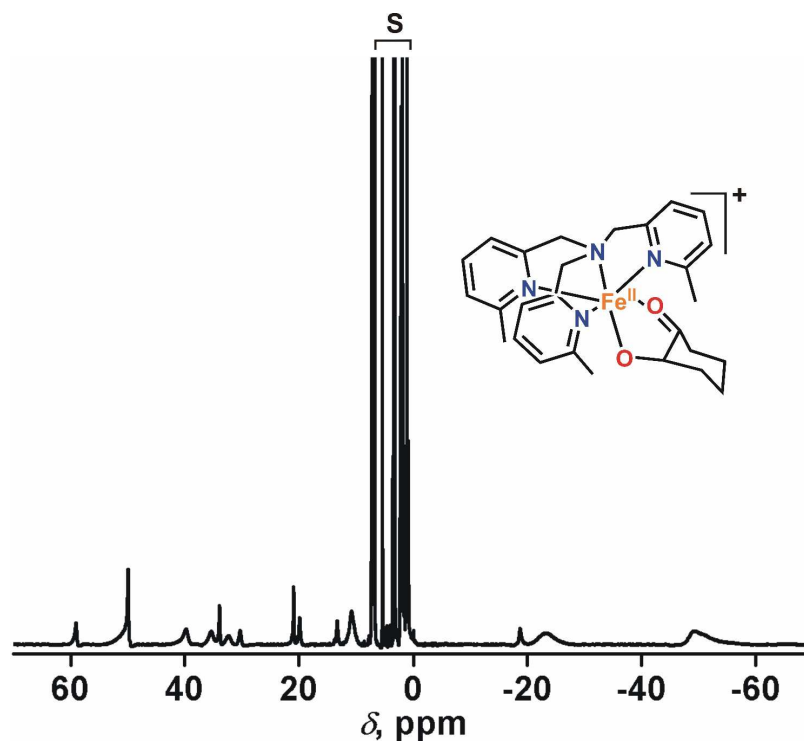

**Figure S6**  $^1\text{H}$  NMR (500 MHz,  $\text{CD}_3\text{CN}$ , 295 K) spectrum of  $[(6\text{-Me}_3\text{-TPA})\text{Fe}^{\text{II}}(\text{HCH})](\text{BPh}_4)$  (**6**). Peaks marked with ‘S’ are from residual solvents.

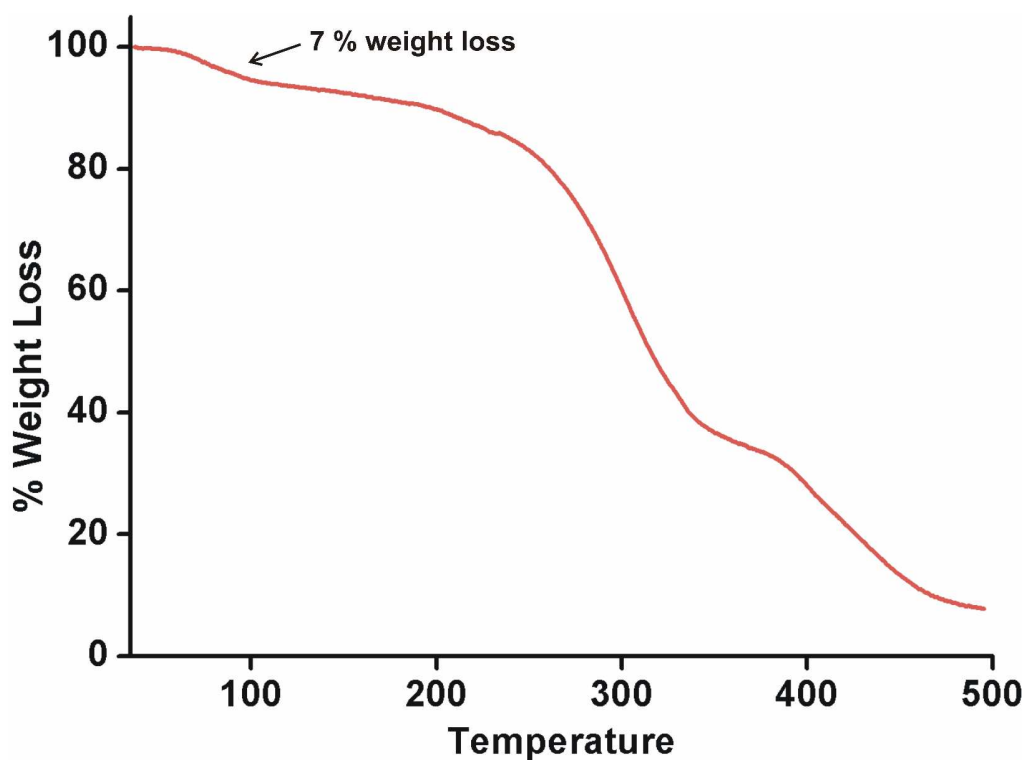

Figure S7 TGA curve for 1·CH<sub>2</sub>Cl<sub>2</sub>.

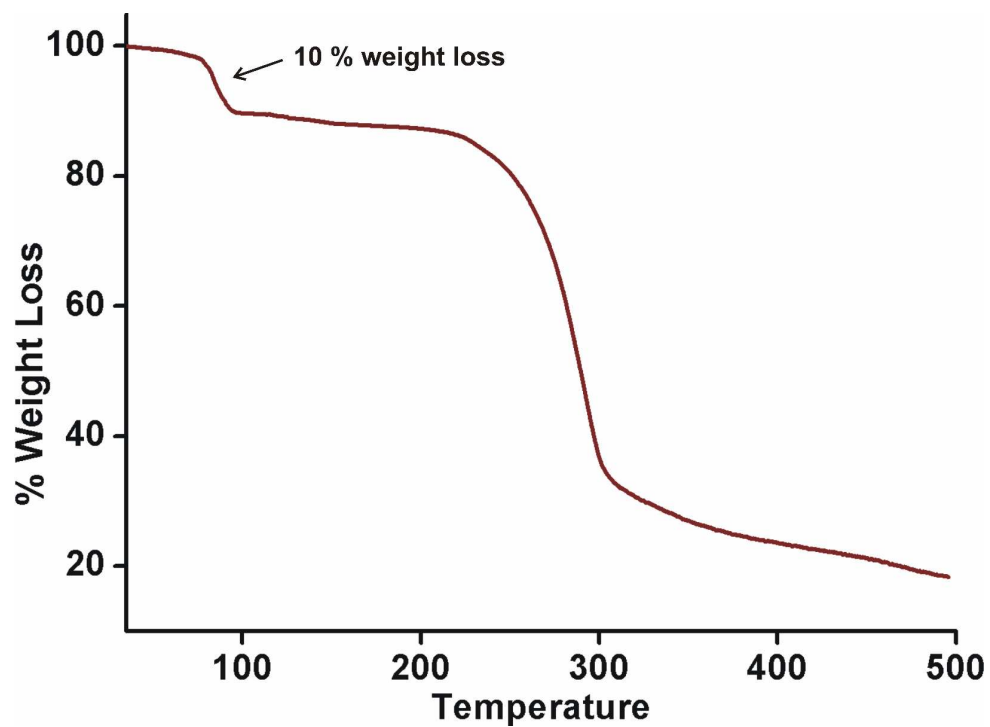

Figure S8 TGA curve for 2·2CH<sub>3</sub>OH.

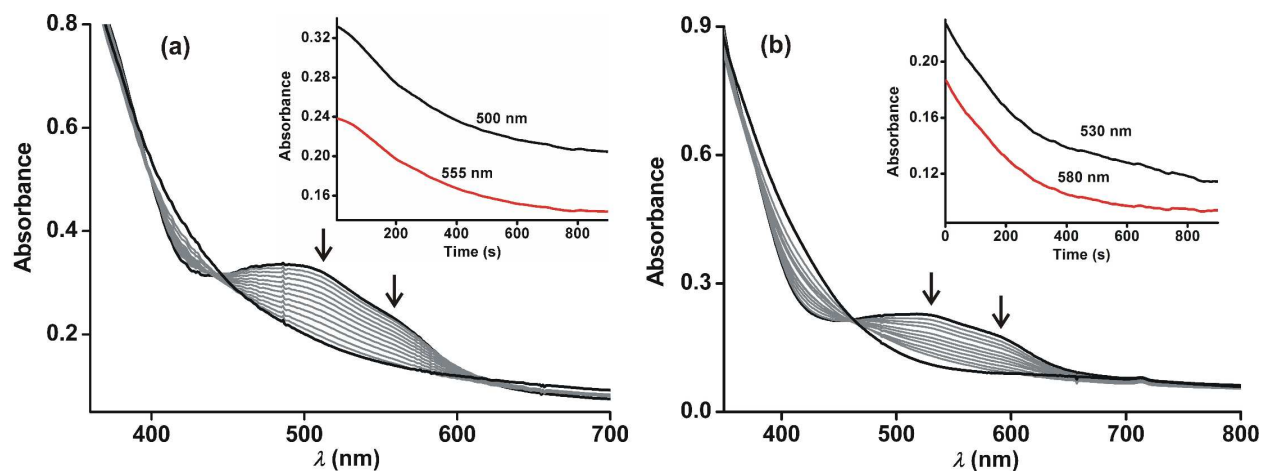

**Figure S9** Optical spectral changes of (a) **3** and (b) **4** (0.5 mM in benzene) with time during the reaction with dioxygen at 283 K. Insets: absorbance as a function of time.

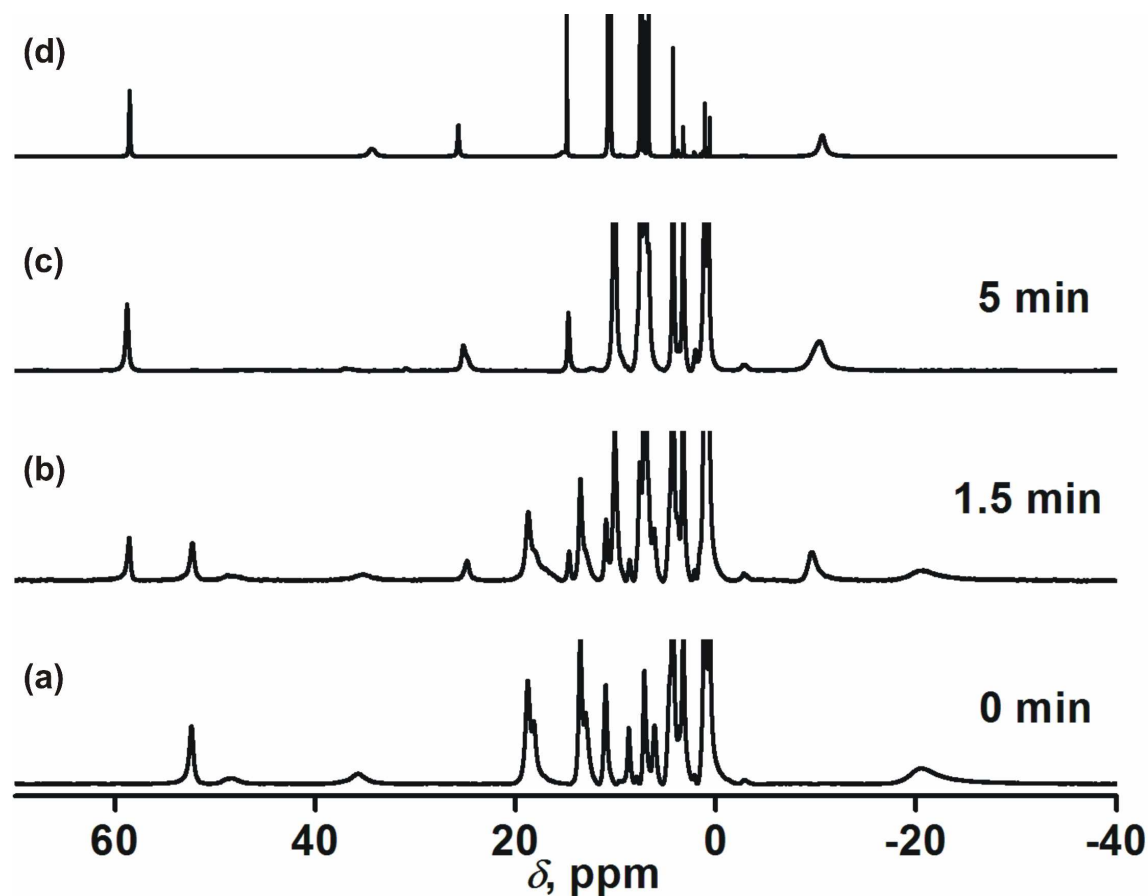

**Figure S10** Time-dependent  $^1\text{H}$  NMR (500 MHz,  $\text{C}_6\text{D}_6$ , 295 K) spectra during the reaction between  $[(\text{Tp}^{\text{Ph}_2})\text{Fe}^{\text{II}}(\text{PHAP})]$  (**1**) and  $\text{O}_2$  (a-c).  $^1\text{H}$  NMR spectrum of  $[(\text{Tp}^{\text{Ph}_2})\text{Fe}^{\text{II}}(\text{benzoate})]$  complex (d).

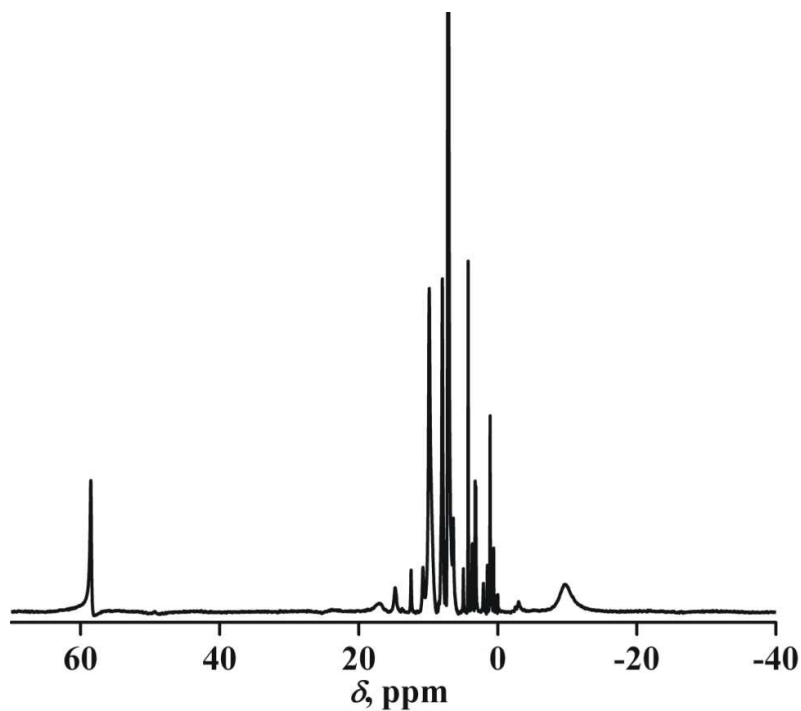

**Figure S11**  $^1\text{H}$  NMR spectrum (500 MHz,  $\text{C}_6\text{D}_6$ , 295 K) of the oxidized solution after the reaction of  $[(\text{Tp}^{\text{Ph}_2})\text{Fe}^{\text{II}}(\text{HCH})]$  (**2**) with  $\text{O}_2$ .

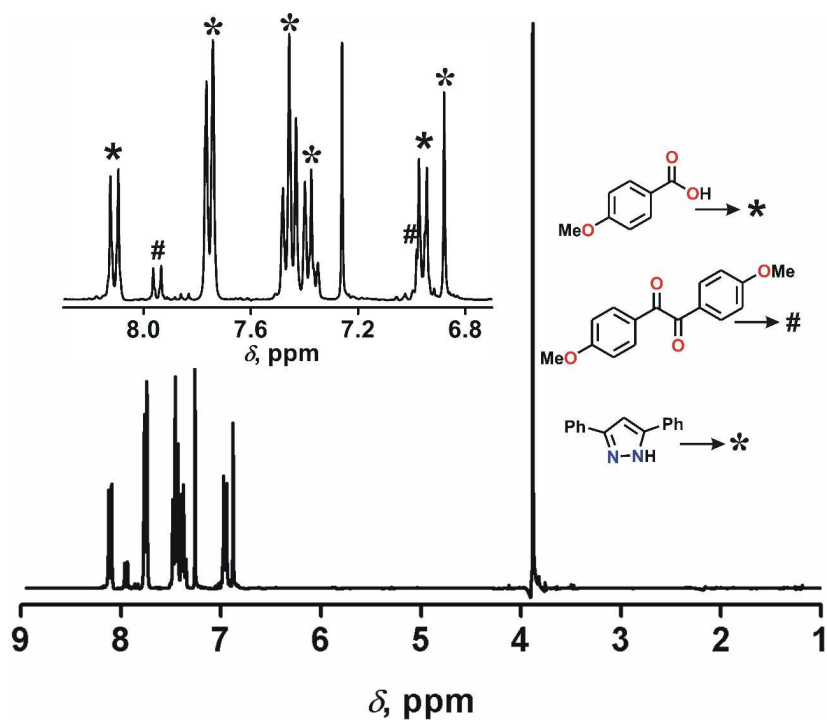

**Figure S12**  $^1\text{H}$  NMR (500 MHz,  $\text{CDCl}_3$ , 295 K) spectrum of organic products isolated from the oxidized solution of  $[(\text{Tp}^{\text{Ph}_2})\text{Fe}^{\text{II}}(\text{HBME})]$  (**3**).

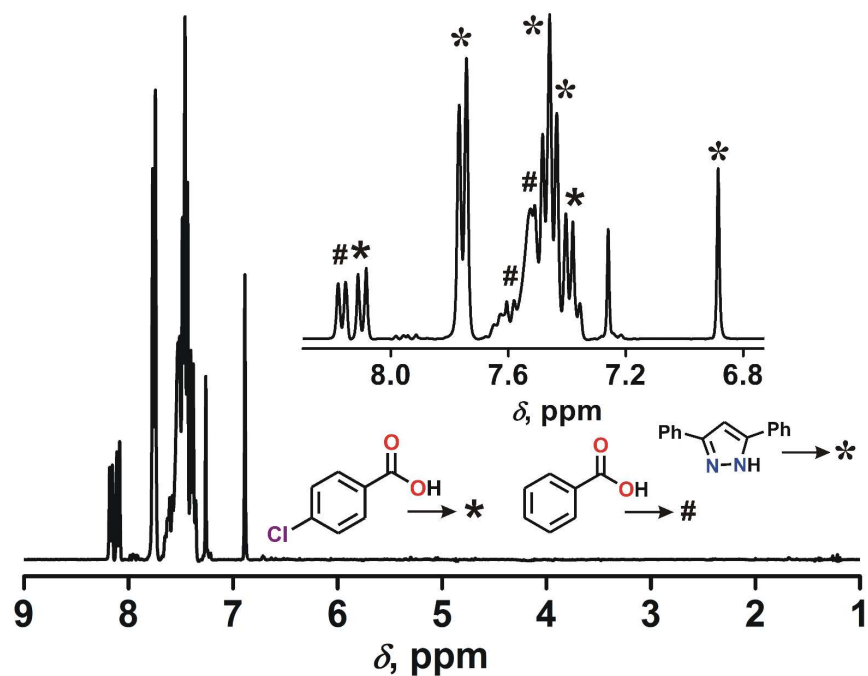

**Figure S13**  $^1\text{H}$  NMR (500 MHz,  $\text{CDCl}_3$ , 295 K) spectrum of organic products isolated from the oxidized solution of  $[(\text{Tp}^{\text{Ph}_2})\text{Fe}^{\text{II}}(\text{CHPE})]$  (**4**).

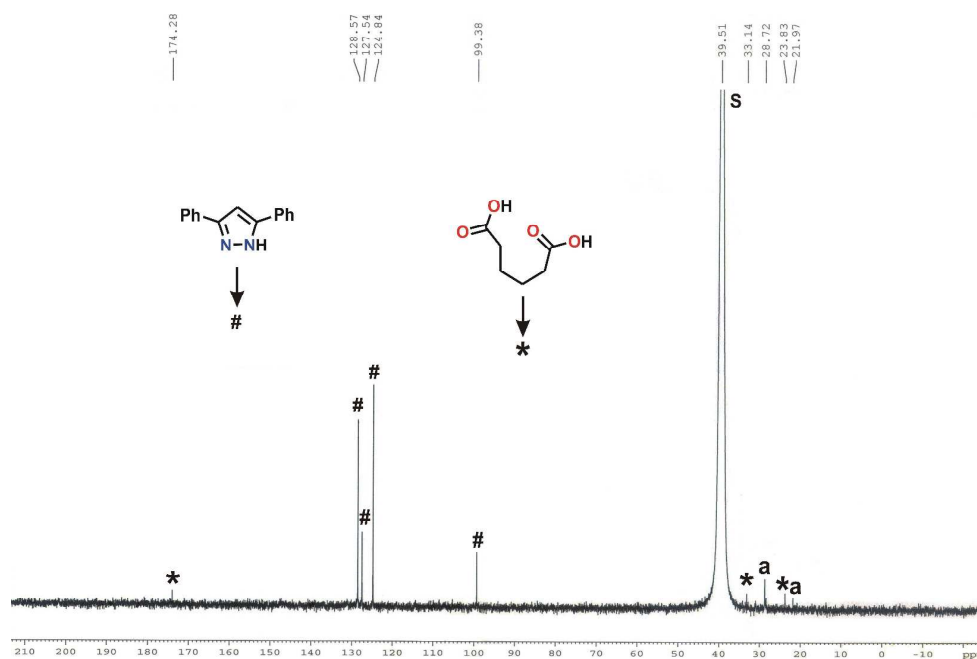

**Figure S14**  $^{13}\text{C}$  NMR (125 MHz,  $\text{DMSO}-d_6$ , 295 K) spectrum of organic products isolated from the reaction of  $[(\text{Tp}^{\text{Ph}_2})\text{Fe}^{\text{II}}(\text{HCH})]$  (**2**) with dioxygen. Peaks marked with 's' and 'a' are from residual solvents.



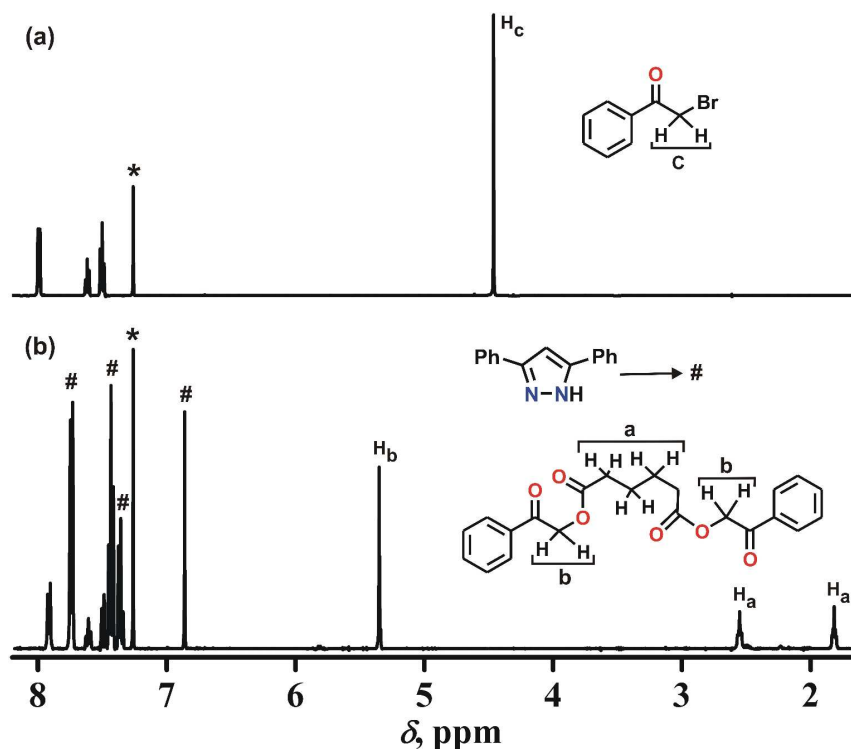

**Figure S15**  $^1\text{H}$  NMR (500 MHz,  $\text{CDCl}_3$ , 295 K) spectra of (a)  $\alpha$ -bromoacetophenone and (b) esterified organic solution after the reaction of  $[(\text{Tp}^{\text{Ph}_2})\text{Fe}^{\text{II}}(\text{HCH})]$  (2) with dioxygen.

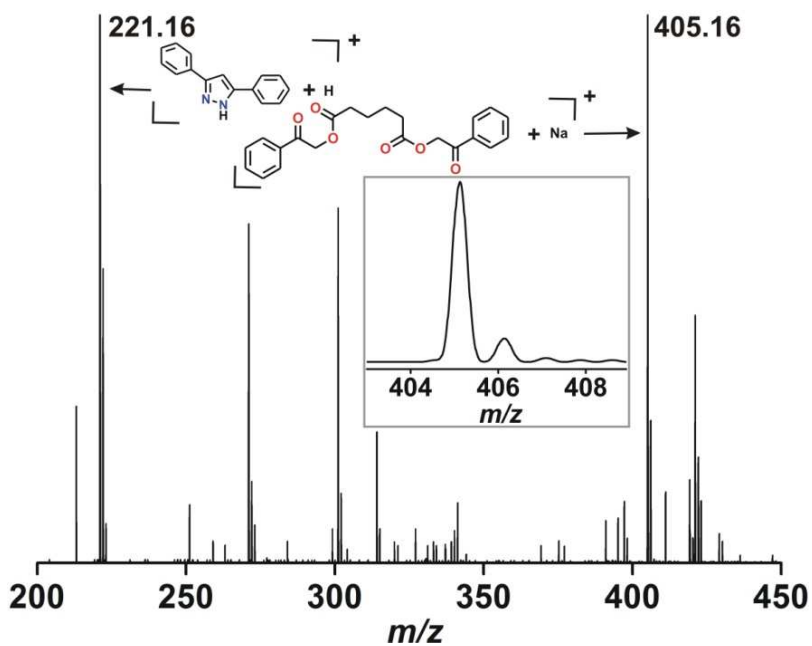

**Figure S16** ESI-mass spectrum (positive ion mode in acetonitrile) of the phenacyl ester of adipic acid.

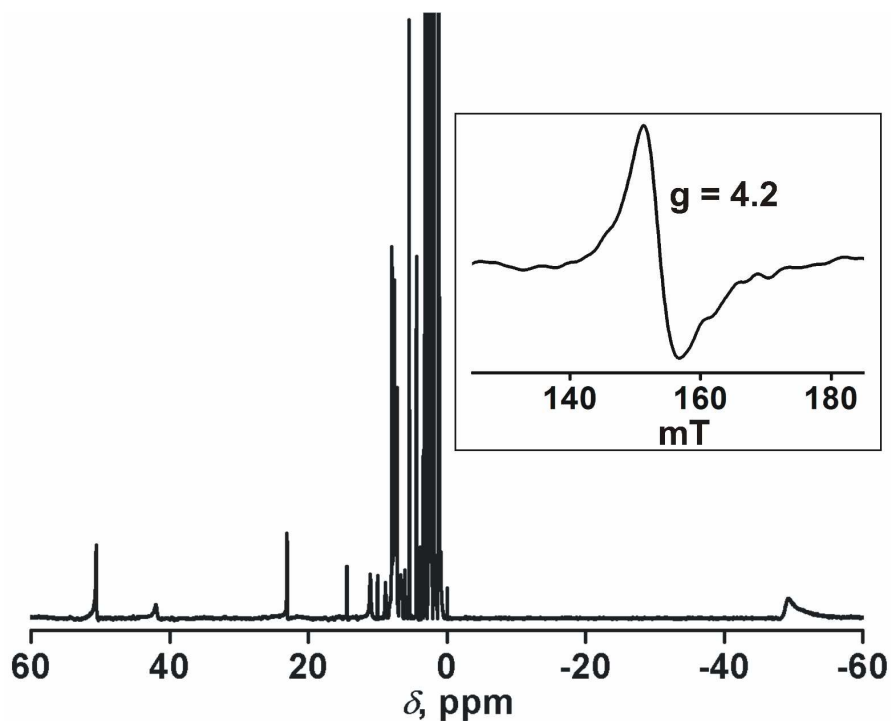

**Figure S17**  $^1\text{H}$  NMR spectrum (500 MHz,  $\text{CD}_3\text{CN}$ , 295 K) of the oxidized solution after the reaction of complex **5** with  $\text{O}_2$ . Inset: X-band EPR spectrum (at 77 K) of the oxidized solution of **5**.

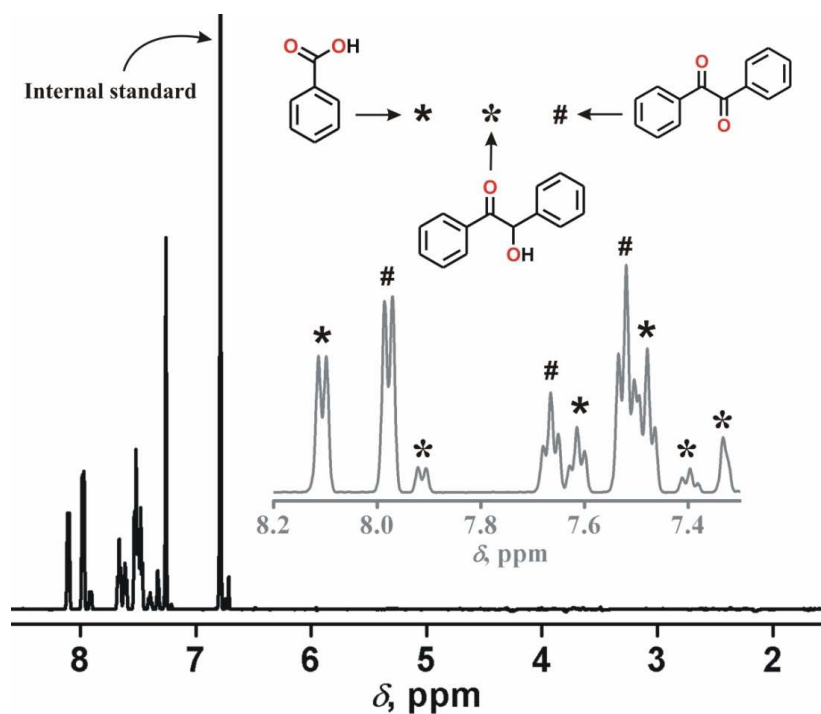

**Figure S18**  $^1\text{H}$  NMR (500 MHz,  $\text{CDCl}_3$ , 295 K) spectrum of the organic products derived from the oxidized solution of the perchlorate salt of **5**.

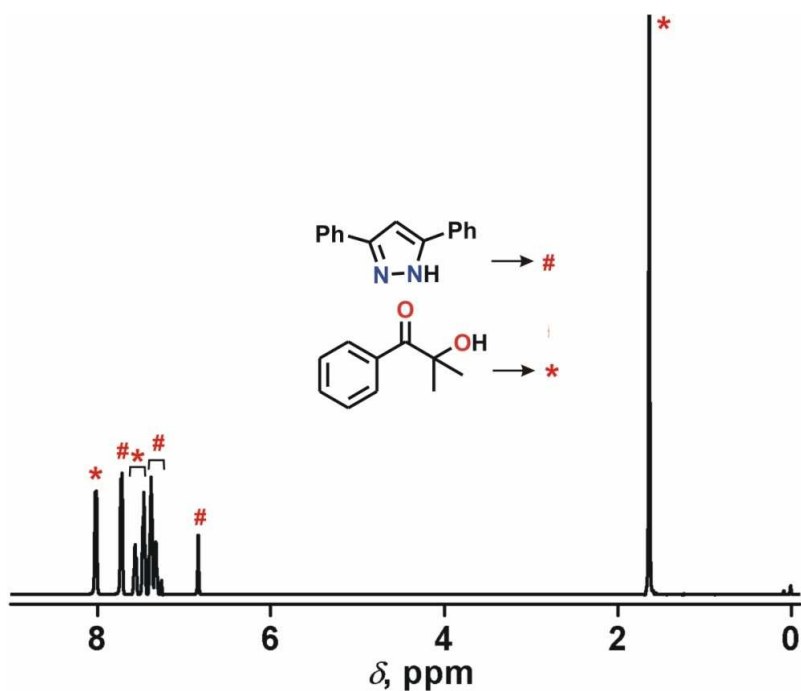

**Figure S19**  $^1\text{H}$  NMR (500 MHz,  $\text{CDCl}_3$ , 295 K) spectrum of organic products after the reaction of 2-hydroxy-2-methyl-1-phenylpropane-1-one with equimolar amounts of  $\text{KTp}^{\text{Ph}_2}$ , iron(II) perchlorate and triethylamine in the presence of dioxygen.

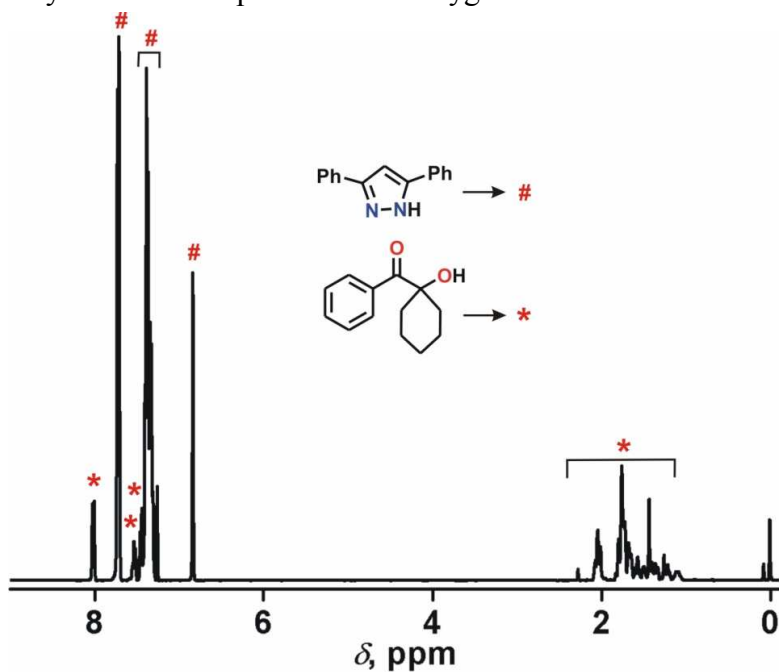

**Figure S20**  $^1\text{H}$  NMR (400 MHz,  $\text{CDCl}_3$ , 295 K) spectrum of organic products after reaction of 1-hydroxycyclohexyl-1-phenylmethanone with equimolar amounts of  $\text{KTp}^{\text{Ph}_2}$ , iron(II) perchlorate and triethylamine in the presence of dioxygen.

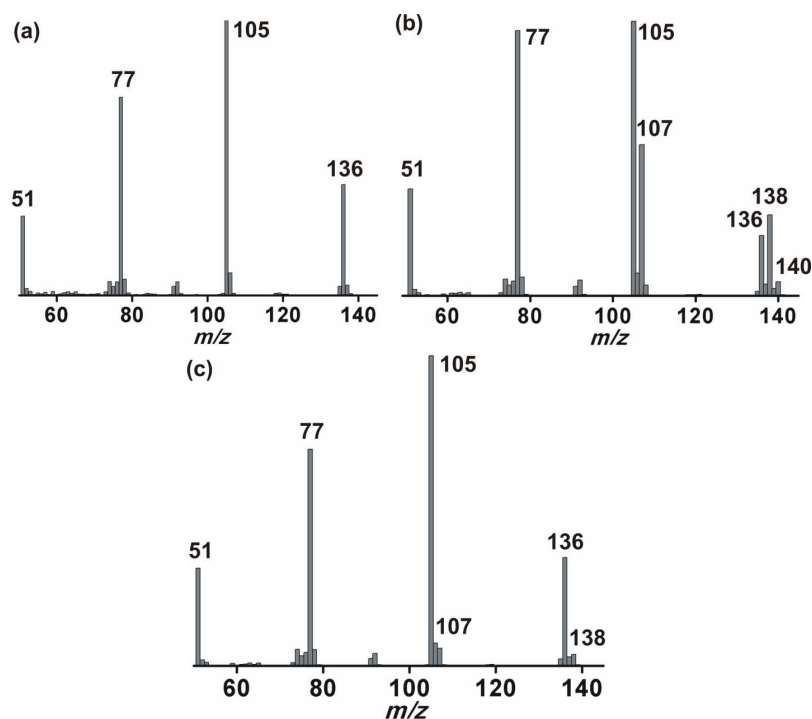

**Figure S21** GC-mass spectrum of methyl benzoate derived from benzoic acid obtained from the oxidized solution of complex **1** after the reaction with (a)  $^{16}\text{O}_2$ , (b)  $^{18}\text{O}_2$ , and (c)  $^{16}\text{O}_2$  and  $\text{H}_2^{18}\text{O}$ .

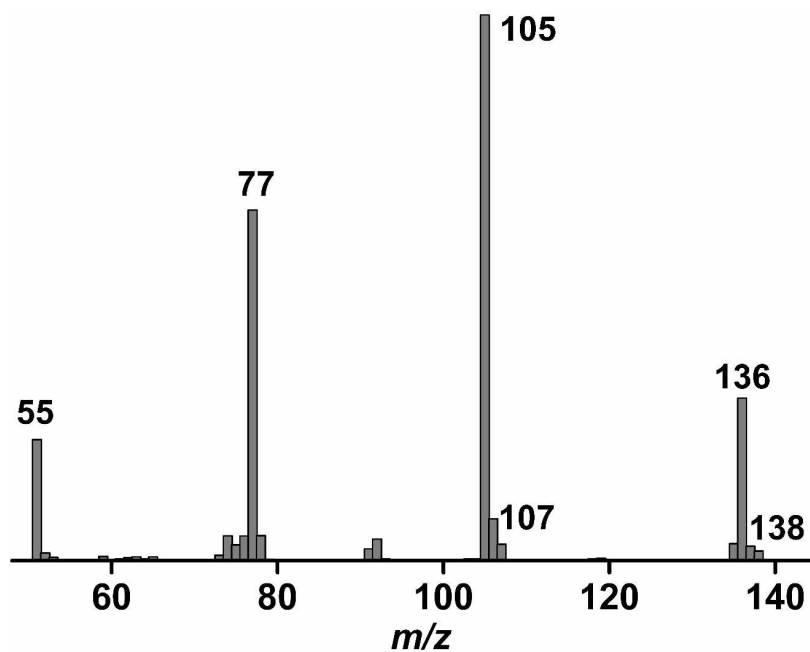

**Figure S22** GC-mass spectrum of methyl benzoate derived from benzoic acid obtained from the oxidized solution of  $[(\text{Tp}^{\text{Ph}_2})\text{Fe}^{\text{II}}(\text{HAP})]$  (HAP = 2-hydroxyacetophenone) after the reaction with  $^{16}\text{O}_2$  and  $\text{H}_2^{18}\text{O}$ .

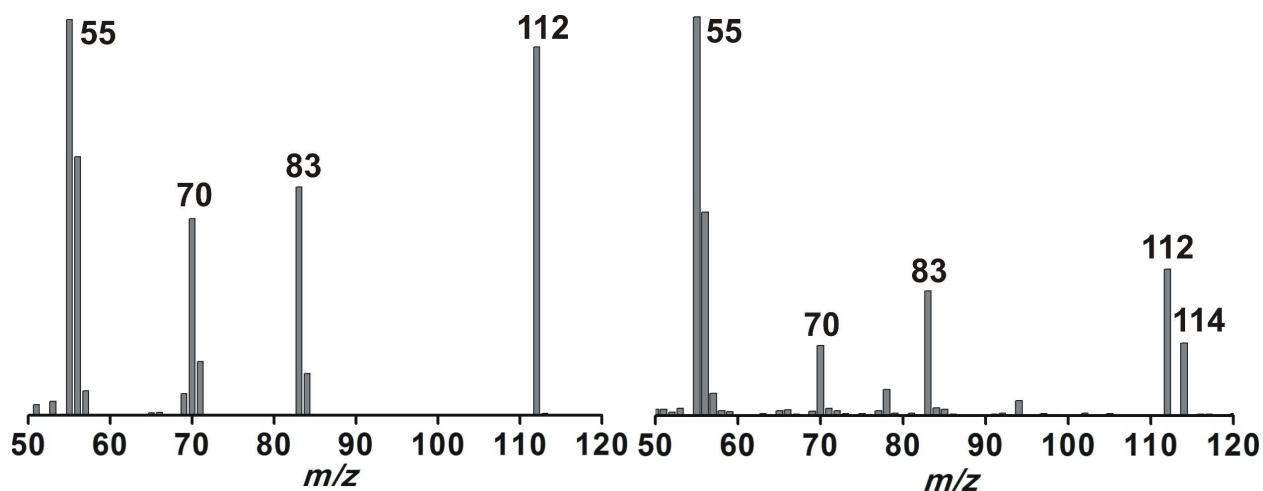

**Figure S23** GC-mass spectrum of cyclohexane-1,2-dione isolated from the reaction of complex **2** with (a)  $^{16}\text{O}_2$  and (b)  $^{16}\text{O}_2$  and  $\text{H}_2^{18}\text{O}$ .

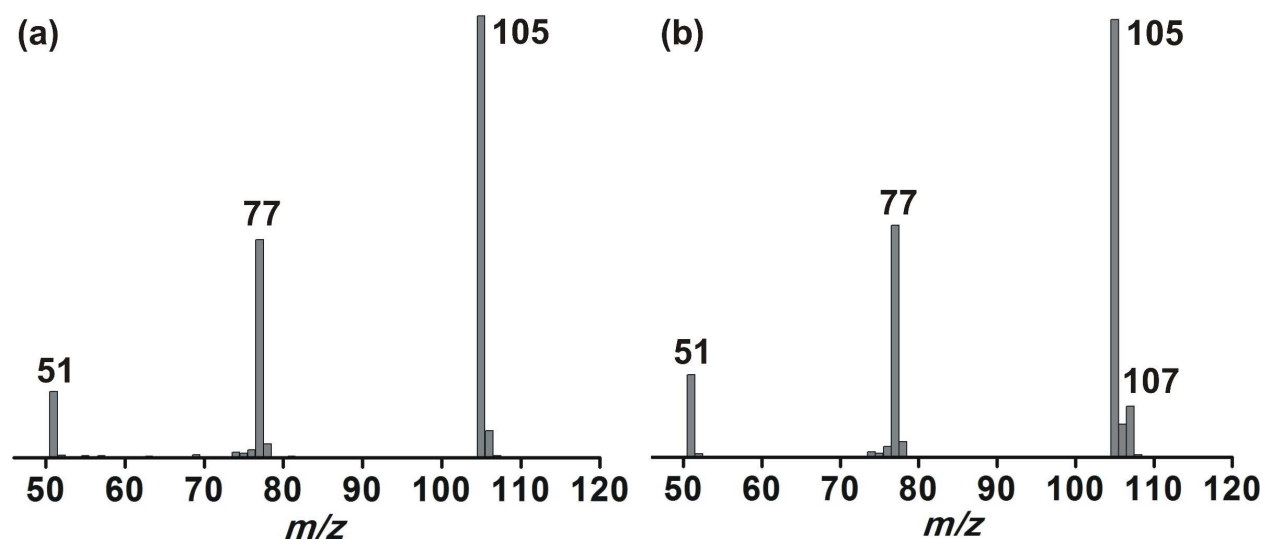

**Figure S24** GC-mass spectrum of benzil derived from the oxidized solution of **5** after the reaction with (a)  $^{16}\text{O}_2$  and with (b)  $^{16}\text{O}_2$  in the presence of  $\text{H}_2^{18}\text{O}$ .

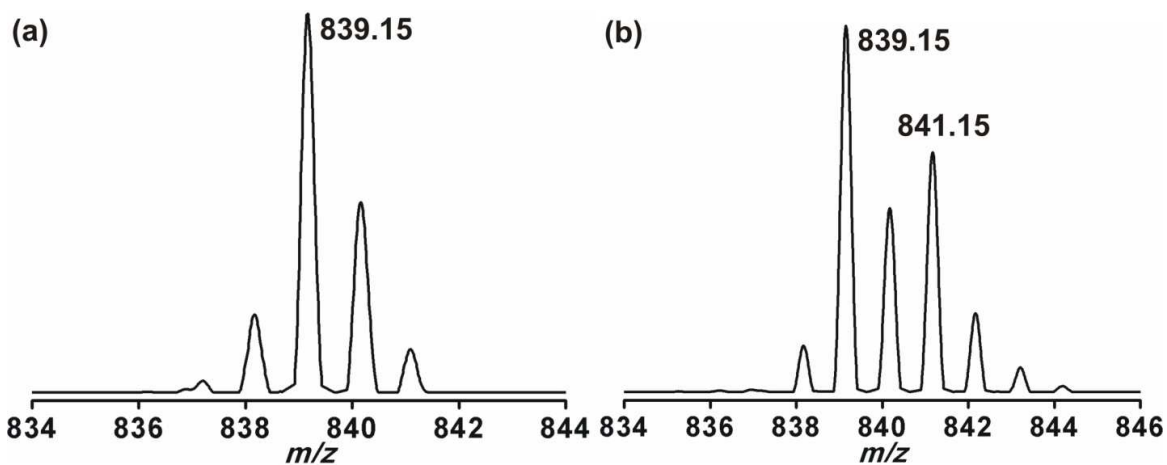

**Figure S25** ESI-mass spectrum (positive ion mode in acetonitrile) of (a) **2** and (b) **2** +  $H_2^{18}O$  under inert atmosphere.

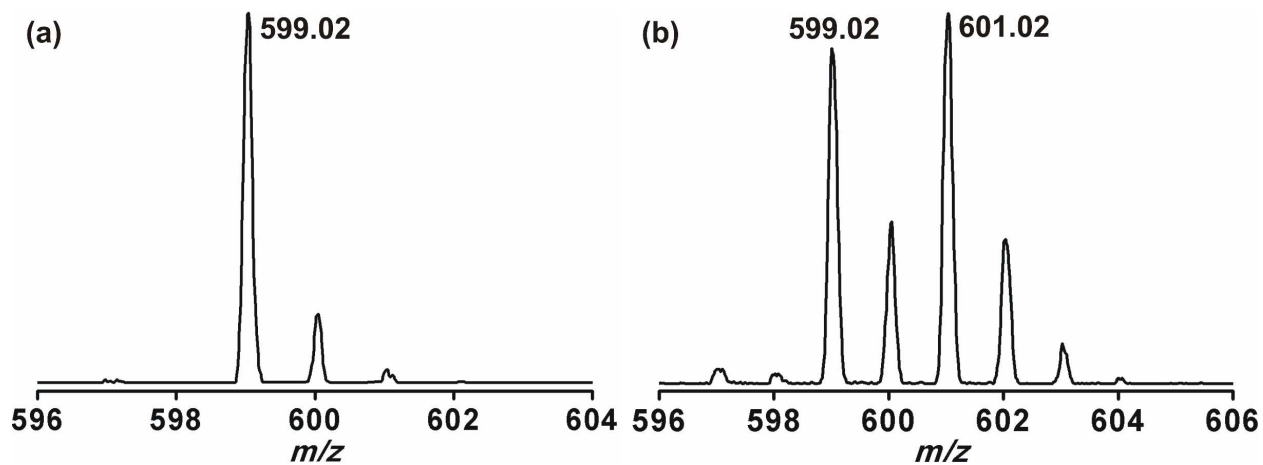

**Figure S26** ESI-mass spectrum (positive ion mode in acetonitrile) of (a) **5** and (b) **5** +  $H_2^{18}O$  under inert atmosphere.

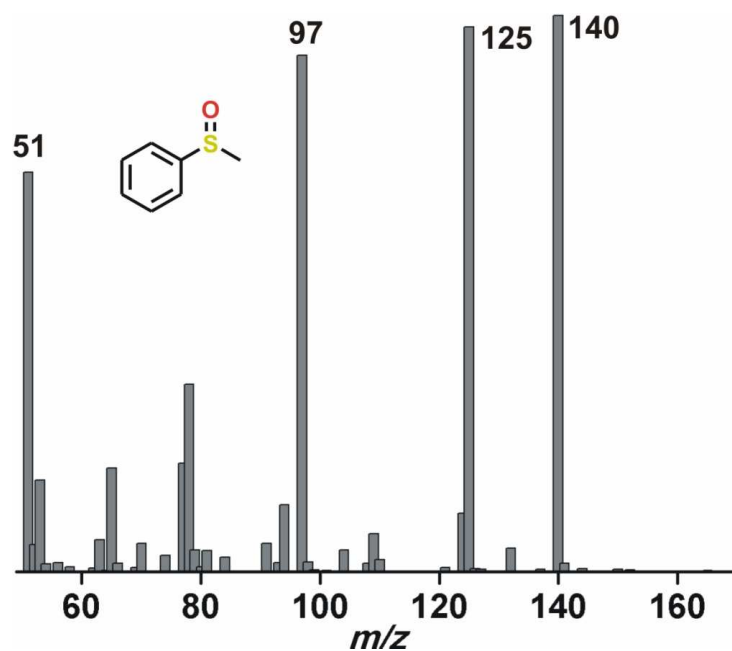

**Figure S27** GC-mass spectrum of thioanisole oxide formed in the reaction of **1** with thioanisole (10 equiv) and dioxygen.

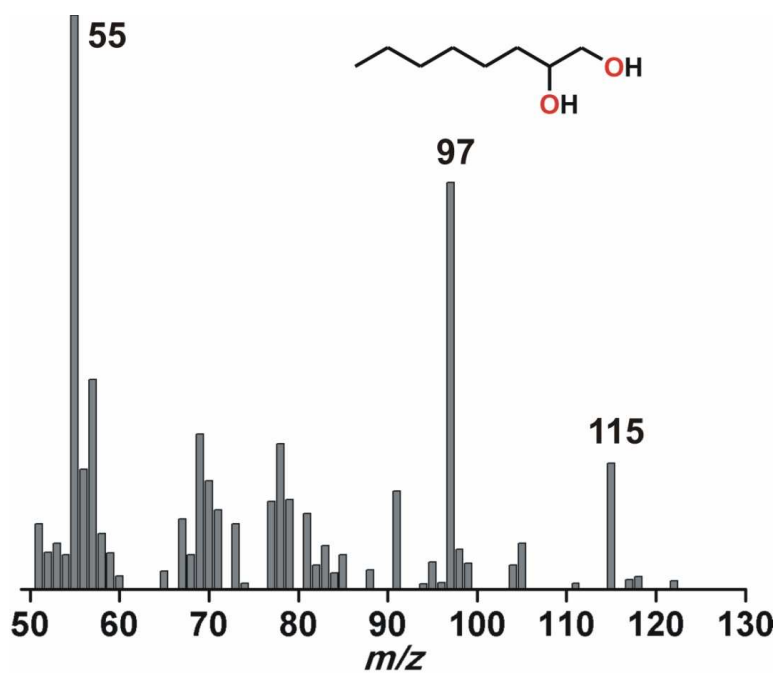

**Figure S28** GC-mass spectrum of octane-1,2-diol formed in the reaction of **4** with 1-octene (100 equiv) and dioxygen.

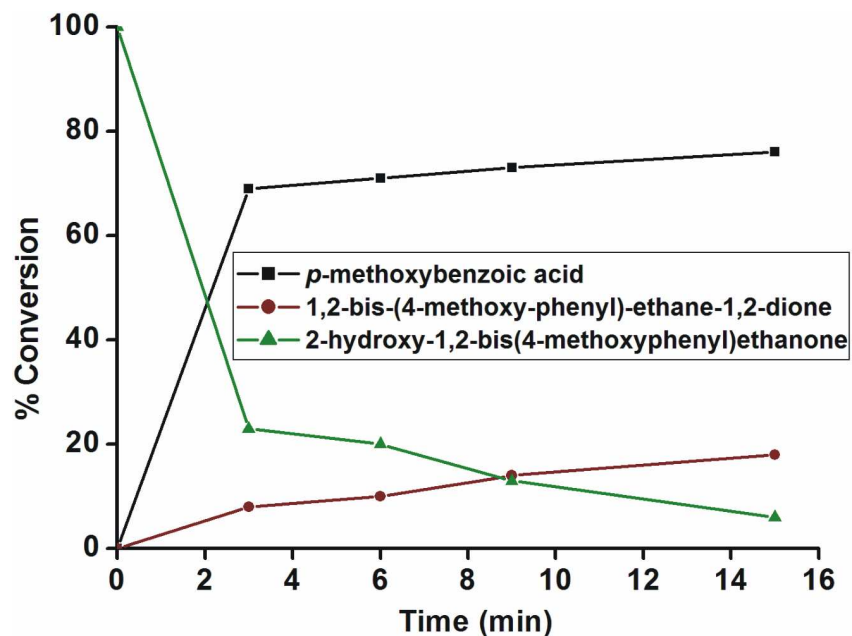

**Figure S29** Time-dependent formation of products in the reaction of complex **3** with dioxygen.

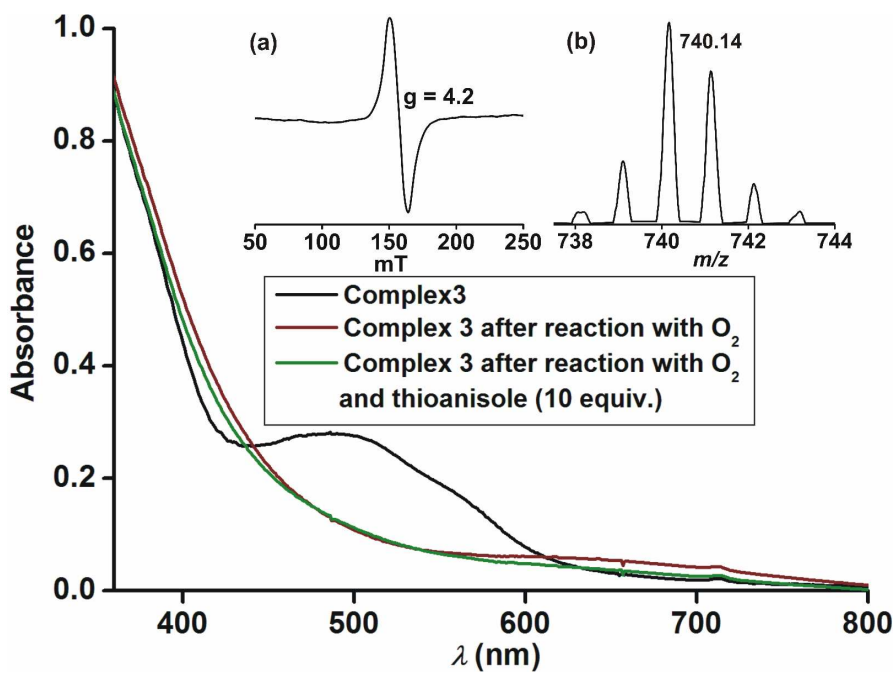

**Figure S30** Optical spectra of **3**, after the reaction of **3** with dioxygen, and after the reaction of **3** with dioxygen in the presence of thioanisole (10 equiv). Inset: (a) X-band EPR (at 77K) spectrum, and (b) ESI-MS (positive ion mode) of the final oxidized solution of **3**.



**Table S1** ESI-MS (positive ion mode) peak assignments of the iron(II)- $\alpha$ -hydroxy ketone complexes.

| Complex  | Ion peaks ( $m/z$ ) | Peak assignment                                                       |
|----------|---------------------|-----------------------------------------------------------------------|
| <b>1</b> | 725.12              | $[(\text{Tp}^{\text{Ph}_2})\text{Fe}]^+$                              |
|          | 743.15              | $[(\text{Tp}^{\text{Ph}_2})\text{Fe}(\text{H}_2\text{O})]^+$          |
|          | 766.22              | $[(\text{Tp}^{\text{Ph}_2})\text{Fe}(\text{CH}_3\text{CN})]^+$        |
| <b>2</b> | 725.12              | $[(\text{Tp}^{\text{Ph}_2})\text{Fe}]^+$                              |
|          | 766.22              | $[(\text{Tp}^{\text{Ph}_2})\text{Fe}(\text{CH}_3\text{CN})]^+$        |
|          | 839.10              | $[(\text{Tp}^{\text{Ph}_2})\text{Fe}(\text{HCH}) + \text{H}]^+$       |
|          | 945.10              | $[(\text{Tp}^{\text{Ph}_2})\text{Fe}(3,5\text{-diphenylpyrazole})]^+$ |
| <b>3</b> | 725.23              | $[(\text{Tp}^{\text{Ph}_2})\text{Fe}]^+$                              |
|          | 766.29              | $[(\text{Tp}^{\text{Ph}_2})\text{Fe}(\text{CH}_3\text{CN})]^+$        |
|          | 945.24              | $[(\text{Tp}^{\text{Ph}_2})\text{Fe}(3,5\text{-diphenylpyrazole})]^+$ |
| <b>4</b> | 725.13              | $[(\text{Tp}^{\text{Ph}_2})\text{Fe}]^+$                              |
|          | 945.14              | $[(\text{Tp}^{\text{Ph}_2})\text{Fe}(3,5\text{-diphenylpyrazole})]^+$ |
|          | 971.21              | $[(\text{Tp}^{\text{Ph}_2})\text{Fe}(\text{CHPE}) + \text{H}]^+$      |
| <b>5</b> | 333.09              | $[(6\text{-Me}_3\text{-TPA}) + \text{H}]^+$                           |
|          | 599.09              | $[(6\text{-Me}_3\text{-TPA})\text{Fe}(\text{PHAP})]^+$                |
| <b>6</b> | 333.23              | $[(6\text{-Me}_3\text{-TPA}) + \text{H}]^+$                           |

.....
